# Supplementary material for: Therapeutic Potential of Tumor Metabolic Reprogramming in Triple-Negative Breast Cancer
Source: MDPI journal article supplement (doi:10.3390/ijms24086945), 2023-04-08
Supplement: s1 [file s1]

**Table S1. Ongoing clinical trials focusing on tumor metabolism administered to breast cancer patients, including those with triple-negative breast cancer.** The 37 recruiting or soon-to-be-active interventional clinical studies involve chemotherapies, immunotherapies, hormone therapies, metabolic inhibitors, fasting-mimicking diets and vitamins.

| NCT Number  | Acronym     | Title                                                                                                                                                                      | Status                 | Conditions                                                                            | Drugs                                                                                           | Phases | No. of patients |
|-------------|-------------|----------------------------------------------------------------------------------------------------------------------------------------------------------------------------|------------------------|---------------------------------------------------------------------------------------|-------------------------------------------------------------------------------------------------|--------|-----------------|
| NCT03179904 |             | FASN Inhibitor TVB-2640 and Trastuzumab in Combination With Paclitaxel or Endocrine Therapy for the Treatment of HER2 Positive Metastatic Breast Cancer                    | Recruiting             | Advanced Breast Carcinoma, HER2 Positive Breast Carcinoma, Stage III-IV Breast Cancer | Anastrozole, Exemestane, FASN Inhibitor TVB-2640 Fulvestrant, Letrozole Paclitaxel, Trastuzumab | II     | 80              |
| NCT04720664 | OASIS       | Oral SM-88 in Patients With Metastatic HR+/HER2- Breast Cancer (OASIS)                                                                                                     | Active, not recruiting | Breast Cancer, Metastatic Breast Cancer, HR+ Breast Carcinoma                         | SM-88                                                                                           | II     | 50              |
| NCT05736367 |             | Investigating the Metabolic Pathways in Hormone Receptor Positive/HER2 Negative Breast Cancer                                                                              | Not yet recruiting     | Breast Cancer                                                                         | Glucose (U-13C-glucose)                                                                         | I      | 16              |
| NCT05763992 | BREAKFAST-2 | Targeting Triple Negative Breast Cancer Metabolism With a Combination of Chemoimmunotherapy and a FASTing-like Approach in the Preoperative Setting: the BREAKFAST 2 Trial | Not yet recruiting     | Breast Cancer, Triple Negative Breast Cancer                                          | Control diet, Fasting-Like Approach                                                             | II     | 145             |
| NCT03971019 | SBSBC       | Survival Benefits of Statins in Breast Cancer Patients                                                                                                                     | Recruiting             | Breast Cancer                                                                         | Statins                                                                                         | III    | 314             |
| NCT04248998 | BREAKFAST   | Calorie Restriction With or Without Metformin in Triple Negative Breast Cancer                                                                                             | Active, not recruiting | Triple Negative Breast Cancer                                                         | Fasting-mimicking diet, Metformin + Preoperative chemotherapy                                   | II     | 30              |

|                          |           |                                                                                                                 |                        |                                                           |                                                                  |      |     |
|--------------------------|-----------|-----------------------------------------------------------------------------------------------------------------|------------------------|-----------------------------------------------------------|------------------------------------------------------------------|------|-----|
| NCT05010356              |           | Insulin Sensitivity After Breast Cancer                                                                         | Recruiting             | Breast Cancer                                             | Insulin                                                          | NA   | 24  |
| NCT05570253              |           | A Study of SDX-7320 in Combination With Eribulin for People With Breast Cancer                                  | Recruiting             | Breast Cancer, Metastatic Triple Negative Breast Cancer   | Eribulin, SDX-7320                                               | II   | 55  |
| NCT05067530 <sup>1</sup> | CAREGIVER | Cyclin dependent Kinase in triple negative breast cancer - a "Window of Opportunity" Study                      | Not yet recruiting     | Triple Negative Breast Neoplasms                          | Palbociclib, Paclitaxel, Carboplatin                             | II   | 126 |
| NCT02317783              |           | Amyloid Plaque Deposition in Chemotherapy-Induced Cognitive Impairment                                          | Recruiting             | Breast Cancer                                             | [18F]Flutemetamol, [18F]fluoro-2-deoxy-D-glucose (FDG)           | II   | 15  |
| NCT05455619              | Amelia-1  | Evexomostat Plus Alpelisib and Fulvestrant in Postmenopausal Women at Risk for Hyperglycemia With Breast Cancer | Recruiting             | HR+/HER2-negative Breast Cancer, Metastatic Breast Cancer | Evexomostat                                                      | I/II | 52  |
| NCT03161353              | PHERGain  | Chemotherapy-free Trastuzumab and Pertuzumab in HER2-positive Breast Cancer: FDG-PET Response-adapted Strategy. | Active, not recruiting | Breast Cancer                                             | Perjeta, Herceptin, Docetaxel, Carboplatin, Letrozole, Tamoxifen | II   | 377 |
| NCT02546232              |           | Improved Breast Cancer Therapy (I-BCT-1) in the Neoadjuvant and Metastatic Setting                              | Active, not recruiting | Breast Cancer                                             | Carboplatin, Paclitaxel                                          | II   | 196 |
| NCT05716516              | ESTHER    | STUDY02001740;22SCH740: Estradiol For ER+ Advanced Breast Cancer (ESTHER)                                       | Not yet recruiting     | Metastatic Breast Cancer                                  | Estradiol                                                        | II   | 36  |

|             |            |                                                                                                                         |                        |                                                            |                                       |      |     |
|-------------|------------|-------------------------------------------------------------------------------------------------------------------------|------------------------|------------------------------------------------------------|---------------------------------------|------|-----|
| NCT05501158 |            | CYP2D6 Genotypes and Breast Cancer Clinical Outcomes in the Indonesian Population                                       | Active, not recruiting | Breast Cancer                                              | Tamoxifen                             | NA   | 150 |
| NCT03121989 | LABC       | Study to Evaluate the Feasibility of 13-C Pyruvate Imaging in Breast Cancer Patients Receiving Neoadjuvant Chemotherapy | Recruiting             | Breast Cancer                                              | Hyperpolarized Pyruvate (13C), NAC    | I    | 13  |
| NCT01419730 |            | Vitamin D and Physical Activity on Bone Health                                                                          | Active, not recruiting | Breast Cancer                                              | Vitamin D3                            | II   | 191 |
| NCT04483505 | ROGABREAST | Rogaratinib, Palbociclib and Fulvestrant in Patients With Breast Cancer.                                                | Active, not recruiting | Metastatic Breast Cancer, HR+ Malignant Neoplasm of Breast | Rogaratinib, Palbociclib, Fulvestrant | I    | 19  |
| NCT01565200 | ZEPHIR     | HER2 Imaging Study to Identify HER2 Positive Metastatic Breast Cancer Patient Unlikely to Benefit From T-DM1            | Active, not recruiting | HER-2 positive Breast Cancer                               | T-DM1, Trastuzumab                    | II   | 90  |
| NCT03934905 |            | Protective Effects of the Nutritional Supplement Sulforaphane on Doxorubicin-Associated Cardiac Dysfunction             | Recruiting             | Breast Cancer                                              | Sulforaphane                          | I/II | 70  |
| NCT03324932 |            | Efficacy of Denosumab on Normal BMD in Women Receiving Adjuvant Aromatase Inhibitors for Early Breast Cancer            | Recruiting             | Breast Cancer                                              | Denosumab                             | III  | 160 |

|             |               |                                                                                                                                              |                        |                                                                                                                   |                                                                                  |      |     |
|-------------|---------------|----------------------------------------------------------------------------------------------------------------------------------------------|------------------------|-------------------------------------------------------------------------------------------------------------------|----------------------------------------------------------------------------------|------|-----|
| NCT01273168 |               | Endoxifen in Adults With Hormone Receptor Positive Solid Tumors                                                                              | Active, not recruiting | HR+ Breast Cancer                                                                                                 | Endoxifen                                                                        | I    | 40  |
| NCT05759949 |               | First-in-Human Study of RLY-5836 in Advanced Breast Cancer and Other Solid Tumors                                                            | Not yet recruiting     | PIK3CA Mutation, HER2-negative Breast Cancer, Metastatic Breast Cancer, Advanced Breast Cancer, HR+ Breast Cancer | RLY-5836 <sup>2</sup> , Fulvestrant, Palbociclib, Ribociclib, Abemaciclib        | I    | 220 |
| NCT05768139 |               | First-in-Human Study of STX-478 as Monotherapy and in Combination With Other Antineoplastic Agents in Participants With Advanced Solid Tumor | Recruiting             | Breast Cancer   Gynecologic Cancer   HNSCC   Solid Tumors                                                         | STX-478, Fulvestrant                                                             | I/II | 160 |
| NCT04862663 | CAPItello-292 | Capivasertib + Palbociclib + Fulvestrant for HR+/HER2- Advanced Breast Cancer (CAPItello-292).                                               | Recruiting             | Locally Advanced (Inoperable) or Metastatic Breast Cancer                                                         | Capivasertib <sup>3</sup> , Fulvestrant, Palbociclib                             | III  | 700 |
| NCT02592083 | PREDIX LumA   | Neoadjuvant Response-guided Treatment of Slowly Proliferating Hormone Receptor Positive Tumors                                               | Active, not recruiting | Early-Stage Breast Carcinoma, HR+ Tumor                                                                           | Tamoxifen or Aromatase Inhibitor or Aromatase Inhibitor + Goserelin, Palbociclib | II   | 10  |
| NCT01992952 | FAKTION       | Fulvestrant +/- Akt Inhibition in Advanced Aromatase Inhibitor Resistant Breast Cancer                                                       | Active, not recruiting | Estrogen Receptor Positive Breast Cancer                                                                          | AZD5363, Fulvestrant                                                             | I/II | 149 |

|             |          |                                                                                                                                                                                               |                        |                                                                         |                                                               |      |     |
|-------------|----------|-----------------------------------------------------------------------------------------------------------------------------------------------------------------------------------------------|------------------------|-------------------------------------------------------------------------|---------------------------------------------------------------|------|-----|
| NCT03284957 | AMEERA-1 | Phase 1 / 2 Study of Amcenestrant (SAR439859) Single Agent and in Combination With Other Anti-cancer Therapies in Postmenopausal Women With Estrogen Receptor Positive Advanced Breast Cancer | Active, not recruiting | Estrogen Receptor Positive Breast Cancer                                | Amcenestrant, Palbociclib, Alpelisib, Everolimus, Abemaciclib | I/II | 136 |
| NCT05483491 |          | KK-LC-1 TCR-T Cell Therapy for Gastric, Breast, Cervical, and Lung Cancer                                                                                                                     | Recruiting             | Gastric Cancer, Breast Cancer, Cervical Cancer, Lung Cancer             | KK-LC-1 TCR-T cells, Aldesleukin                              | I    | 42  |
| NCT01357772 | TAM-01   | Trial of Low Dose Tamoxifen in Women With Breast Intraepithelial Neoplasia - Long Term Follow-up                                                                                              | Active, not recruiting | Breast Neoplasms                                                        | Tamoxifen                                                     | III  | 500 |
| NCT05753657 |          | A Pilot Study of Monitoring Insulin Levels and Treating Hyperinsulinemia and Hyperglycemia With Pioglitazone in Patients Treated With Alpelisib for Metastatic Breast Cancer.                 | Recruiting             | Metastatic Breast Cancer   Hyperinsulinism   Hyperglycemia Drug Induced | Pioglitazone                                                  | I    | 30  |
| NCT03343054 |          | A Phase 1 Study Of Talazoparib, PARP Inhibitor, In Japanese Patients With Advanced Solid Tumors                                                                                               | Active, not recruiting | Neoplasms, Breast Neoplasms                                             | Talazoparib                                                   | I    | 28  |

|             |       |                                                                                                                                                      |                        |                                                                                |                                                     |      |      |
|-------------|-------|------------------------------------------------------------------------------------------------------------------------------------------------------|------------------------|--------------------------------------------------------------------------------|-----------------------------------------------------|------|------|
| NCT04247126 |       | A Study of SY 5609, a Selective CDK7 Inhibitor, in Advanced Solid Tumors                                                                             | Active, not recruiting | Advanced Solid Tumor, Breast Cancer, Small-cell Lung Cancer, Pancreatic Cancer | SY-5609, Fulvestrant, Gemcitabine, Nab-paclitaxel   | I    | 160  |
| NCT04004910 |       | A Study Comparing Immunopheresis Alone or In Combination With Chemotherapy Versus Chemotherapy Alone in Treatment of Advanced Breast Cancer Patients | Recruiting             | Advanced Breast Cancer                                                         | Plasma soluble TNF receptor pulldown + chemotherapy | I/II | 170  |
| NCT04395339 | GLORY | GM1 Prophylaxis for WBRT Related Cognitive Dysfunction                                                                                               | Recruiting             | Brain Metastases, Breast Cancer                                                | Monosialotetrahexosyl ganglioside (GM1)             | III  | 204  |
| NCT02632448 |       | A Study of LY2880070 in Participants With Advanced or Metastatic Cancer                                                                              | Recruiting             | Solid Tumors                                                                   | LY2880070 <sup>4</sup> , Gemcitabine                | I/II | 229  |
| NCT02000089 | CAPS5 | The Cancer of the Pancreas Screening-5 CAPS5)Study                                                                                                   | Recruiting             | Breast Cancer and Pancreas Cancer                                              | Secretin                                            | III  | 7000 |

<sup>1</sup> Primary endpoint, difference in early (i.e., after three weeks of therapy, 1 cycle) metabolic response. <sup>2</sup> RLY-5836 is a PI3K $\alpha$  Inhibitor. <sup>3</sup> Capivasertib is an oral serine/threonine kinase inhibitor, as an inhibitor of protein kinase B. Capivasertib affects the PI3K/Akt/mTOR signaling pathway. <sup>4</sup> LY2880070 is an oral, selective competitive inhibitor of checkpoint kinase 1.
